# Supplementary material for: A New Dicoumarinyl Ether from the Roots of Stellera chamaejasme L
Source: MDPI journal article supplement (doi:10.3390/molecules19021603), 2014-01-27
Supplement: s1 [file s1]

## Supplementary Materials

**Figure S1.**  $^1\text{H}$ -NMR spectrum of compound **1** at 600 MHz in  $\text{CD}_3\text{COCD}_3$ .

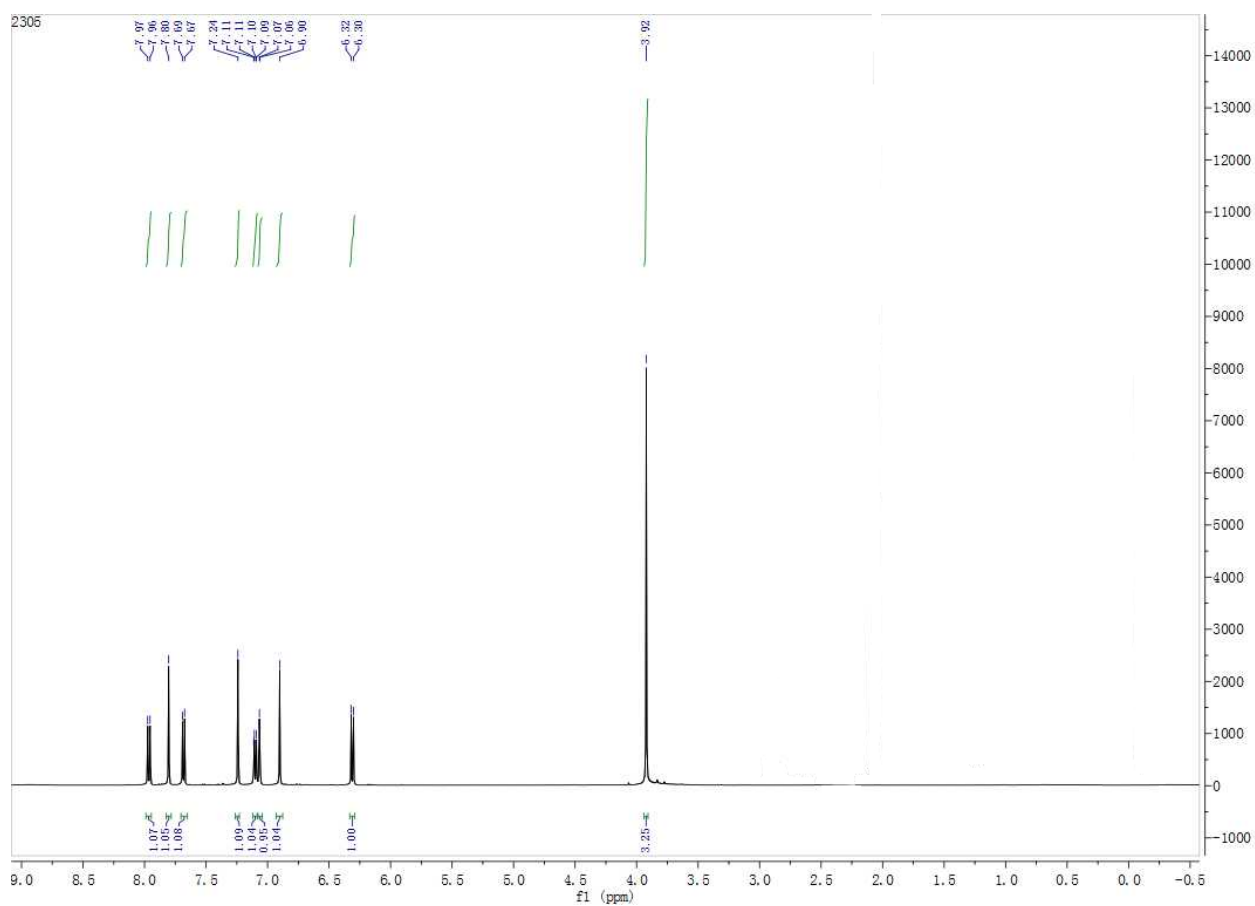

**Figure S2.**  $^{13}\text{C}$ -NMR spectrum of compound **1** at 150 MHz in  $\text{CD}_3\text{COCD}_3$ .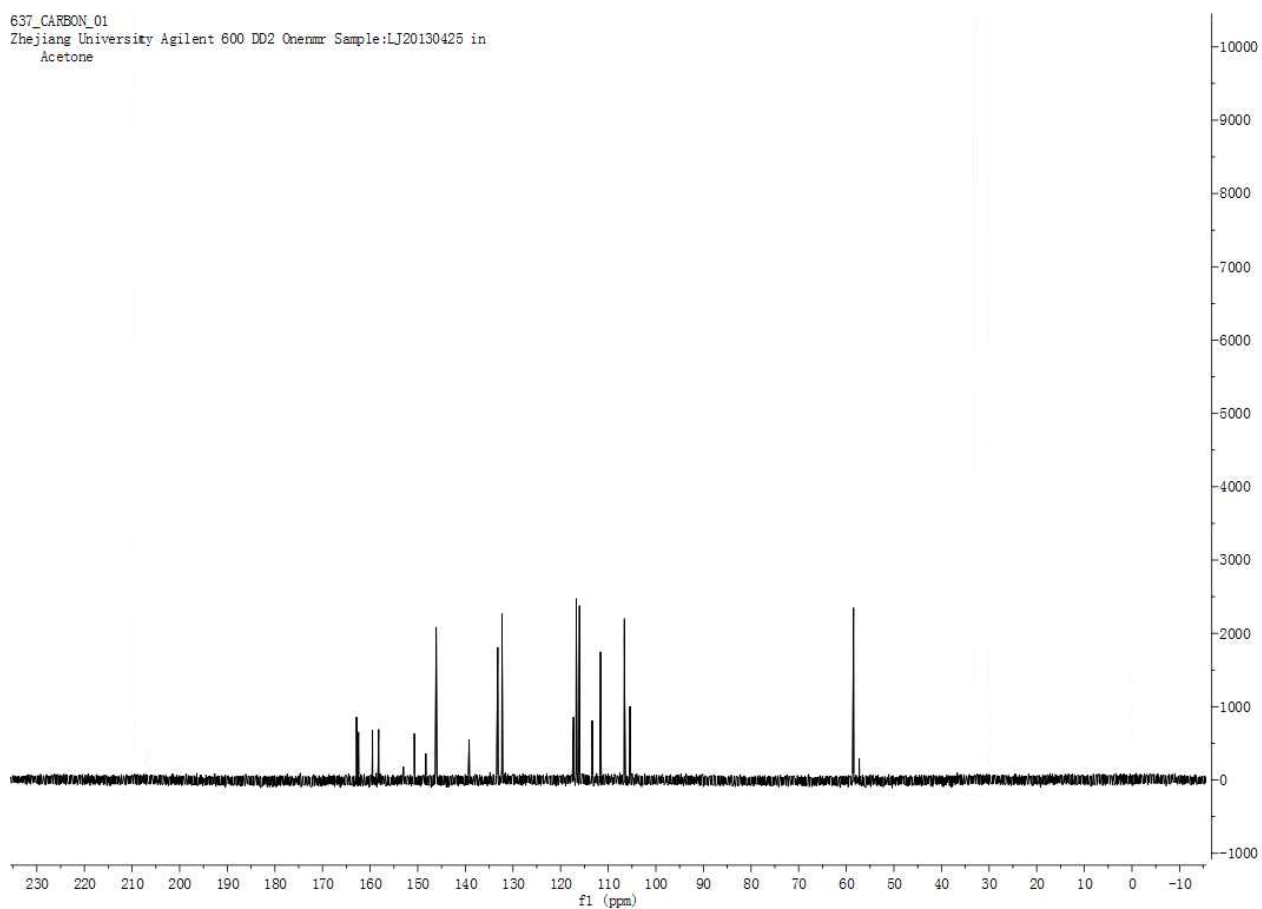

**Figure S3.**  $^1\text{H}$ - $^1\text{H}$  COSY spectrum of compound **1** at 600 MHz in  $\text{CD}_3\text{COCD}_3$ .

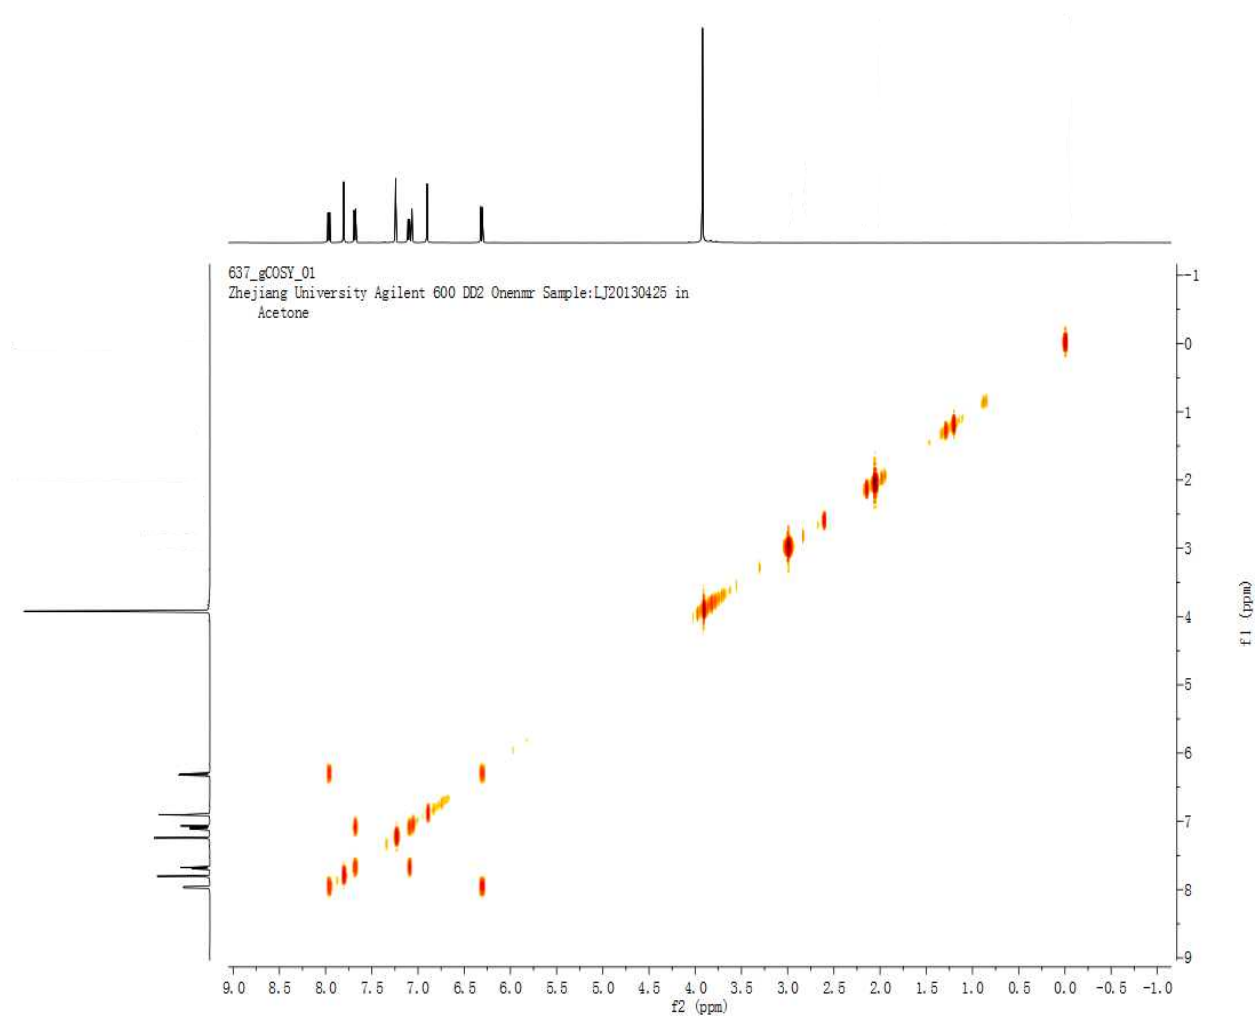

**Figure S4.** HSQC spectrum of compound **1** at 600 MHz in CD<sub>3</sub>COCD<sub>3</sub>.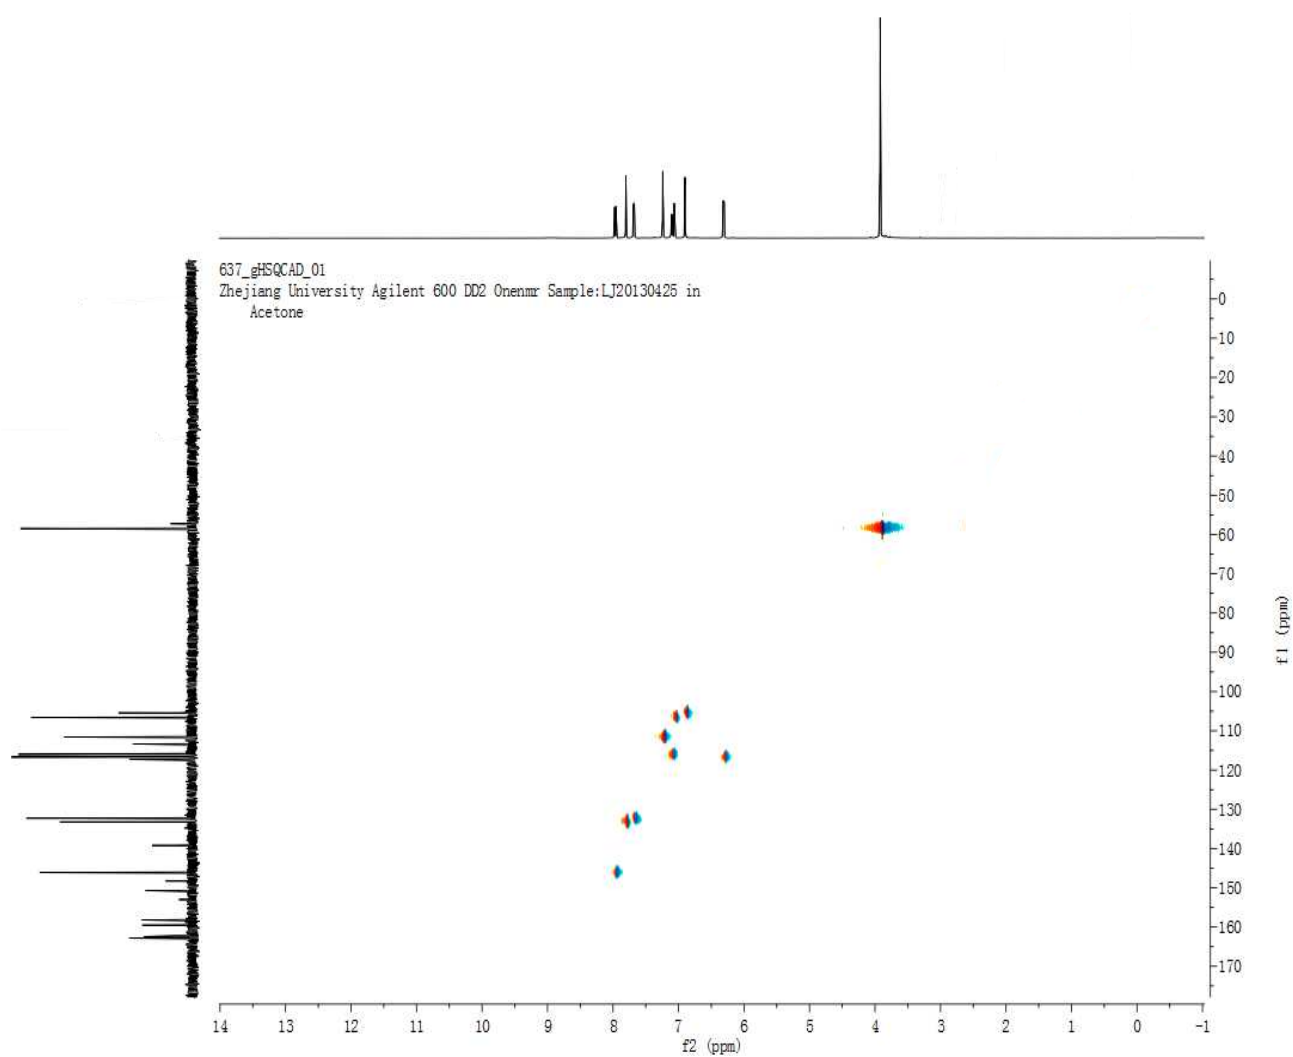

**Figure S5.** HMBC spectrum of compound **1** at 600 MHz in CD<sub>3</sub>COCD<sub>3</sub>.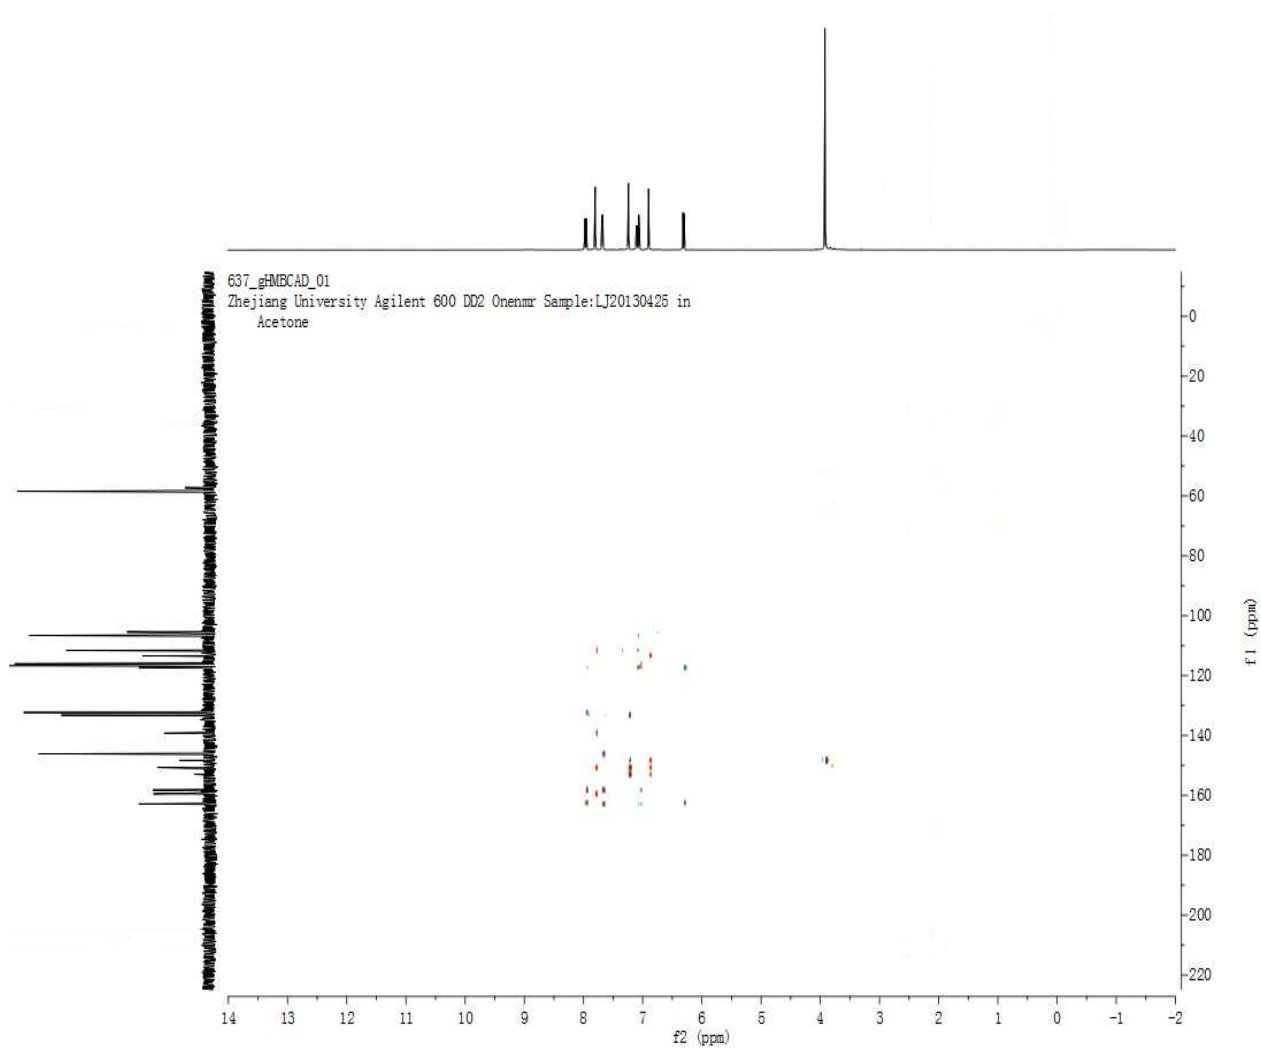

**Figure S6.** HMBC spectrum of compound **1** at 600 MHz in CD<sub>3</sub>COCD<sub>3</sub>.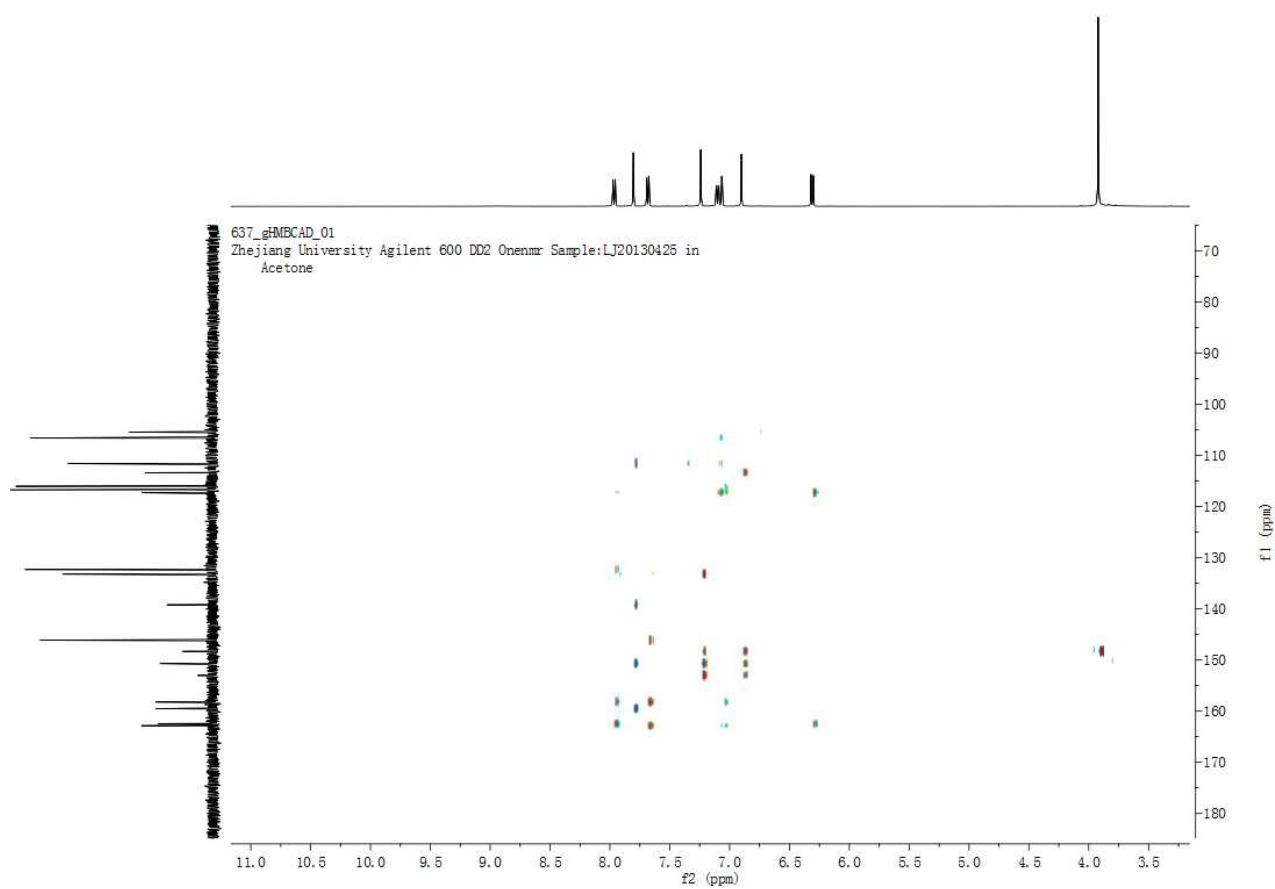

**Figure S7.** NOESY spectrum of compound **1** at 600 MHz in CD<sub>3</sub>COCD<sub>3</sub>.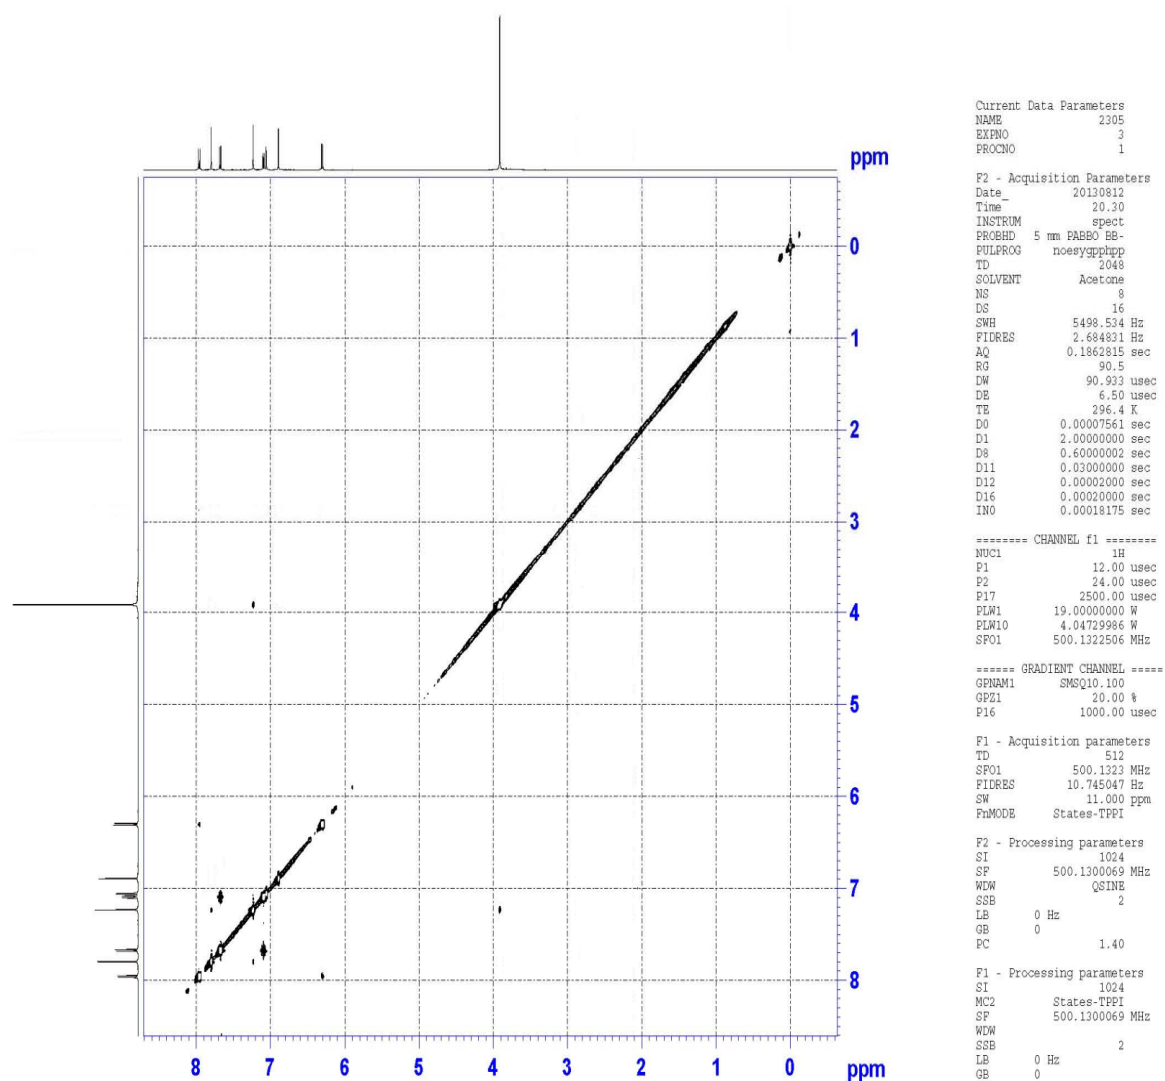

**Figure S8.** NOESY spectrum of compound **1** at 600 MHz in CD<sub>3</sub>COCD<sub>3</sub>.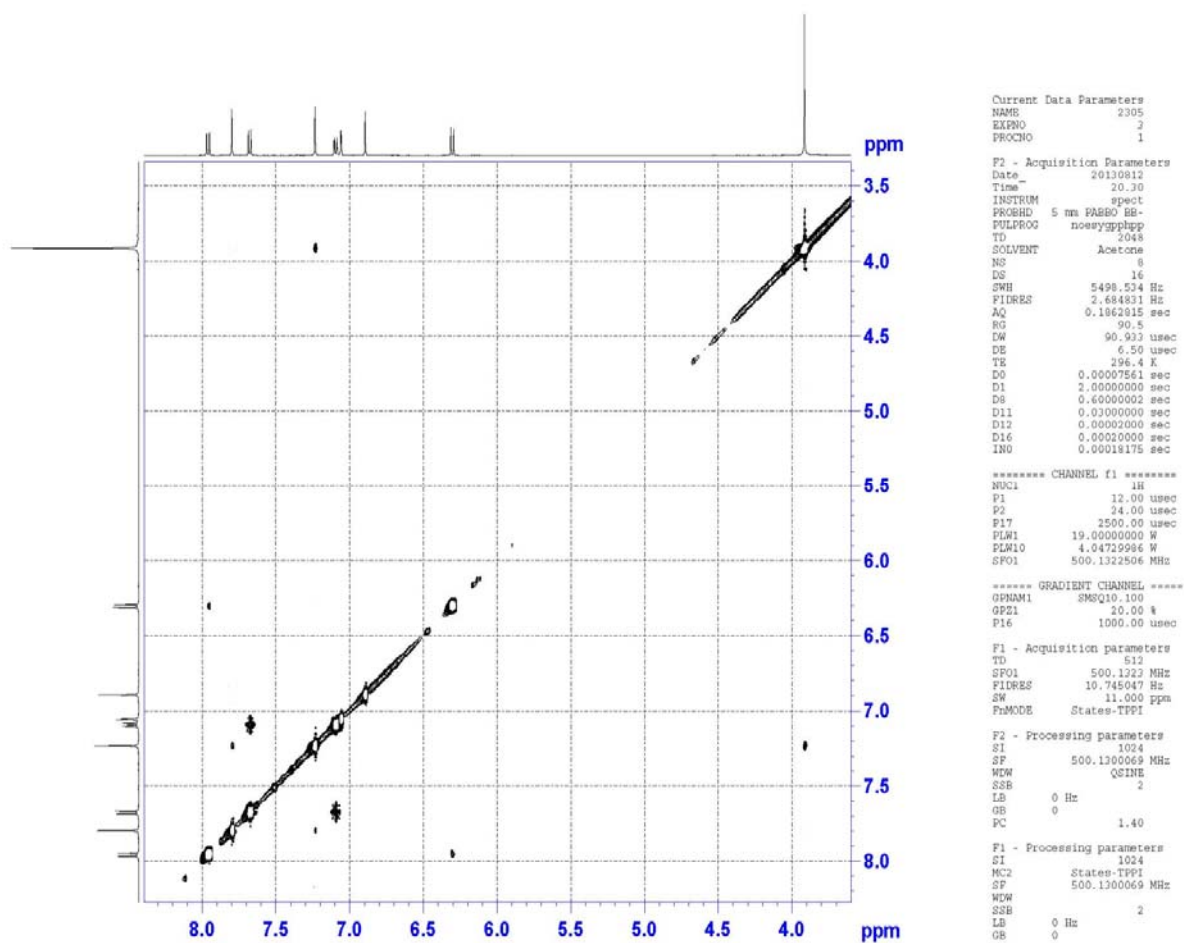**Figure S9.** HR-ESI-MS spectrum of compound **1** in MeOH.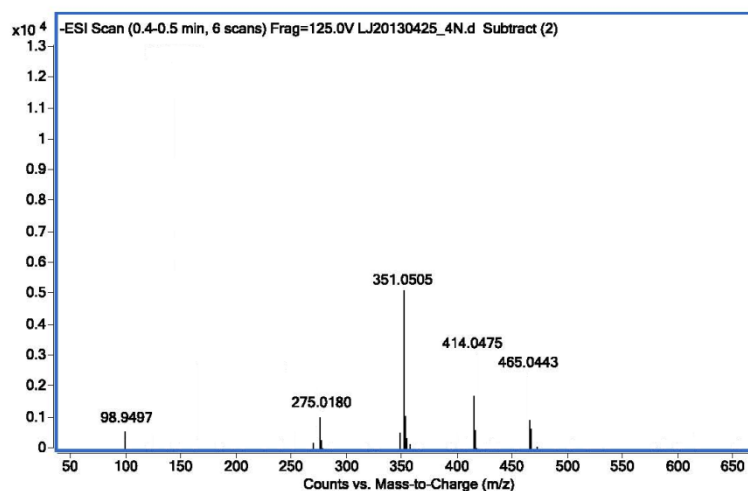

| Ion Formula | m/z      | Calc m/z | Diff (ppm) | DBE  |
|-------------|----------|----------|------------|------|
| C19 H11 O7  | 351.0505 | 351.0505 | -0.06      | 14.5 |
